# Supplementary material for: Aluminium phosphide (Al12P12) nanocage as a potential sensor for volatile organic compounds: A DFT study
Source: Royal Society of Chemistry journal article supplement (doi:10.1039/d4ra01828a), 2024-01-01
Supplement: d4ra01828a1.pdf [file d4ra01828a1.pdf]

## Supporting Information

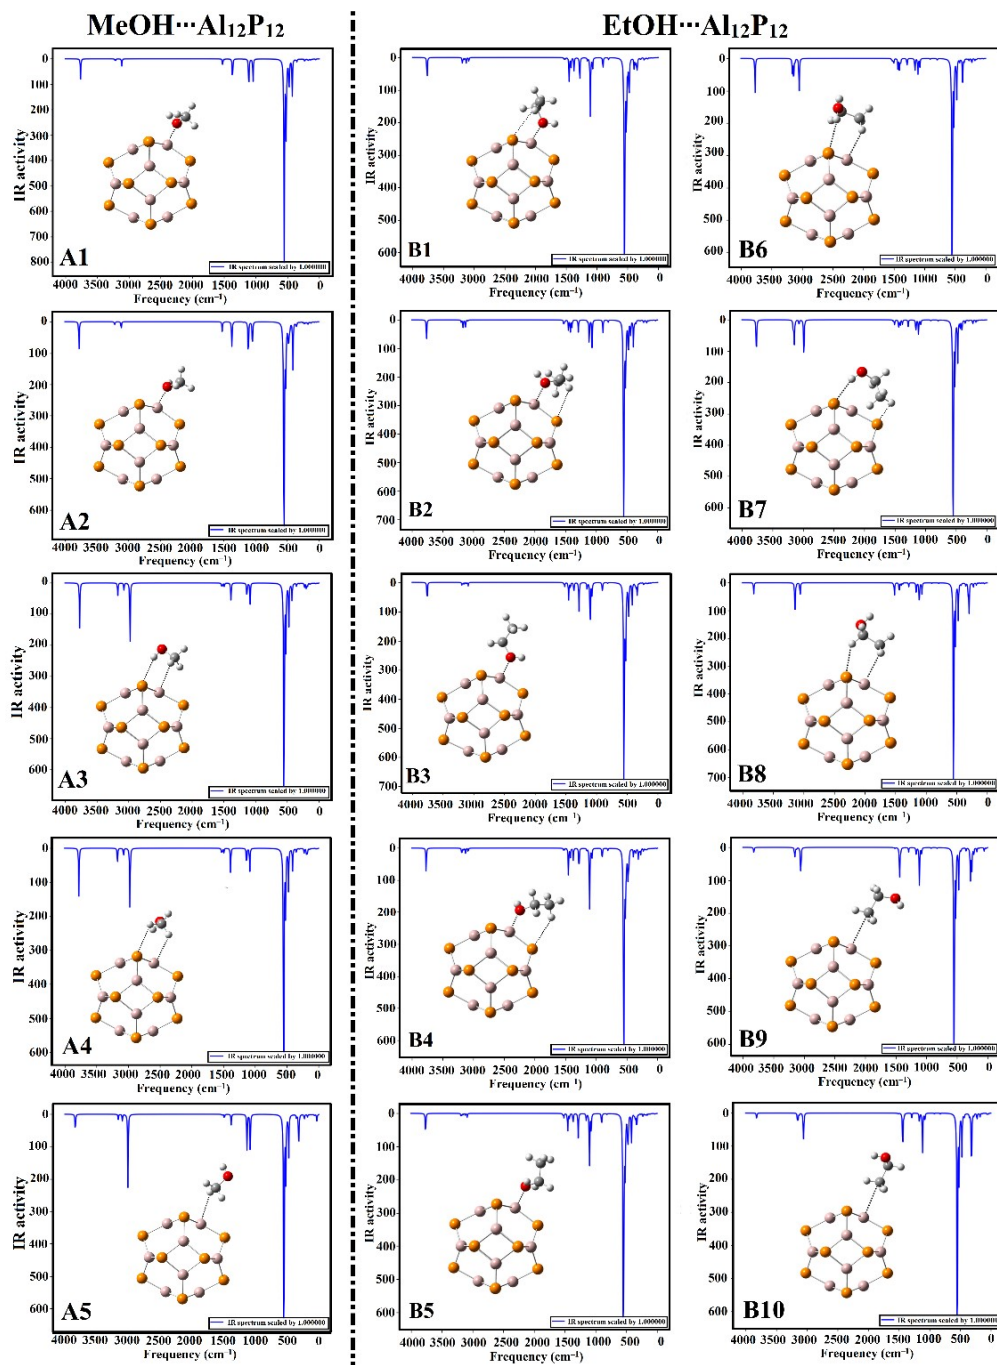

Figure S1. IR spectra of the optimized MeOH... and EtOH...Al<sub>12</sub>P<sub>12</sub> complexes within all plausible configurations.

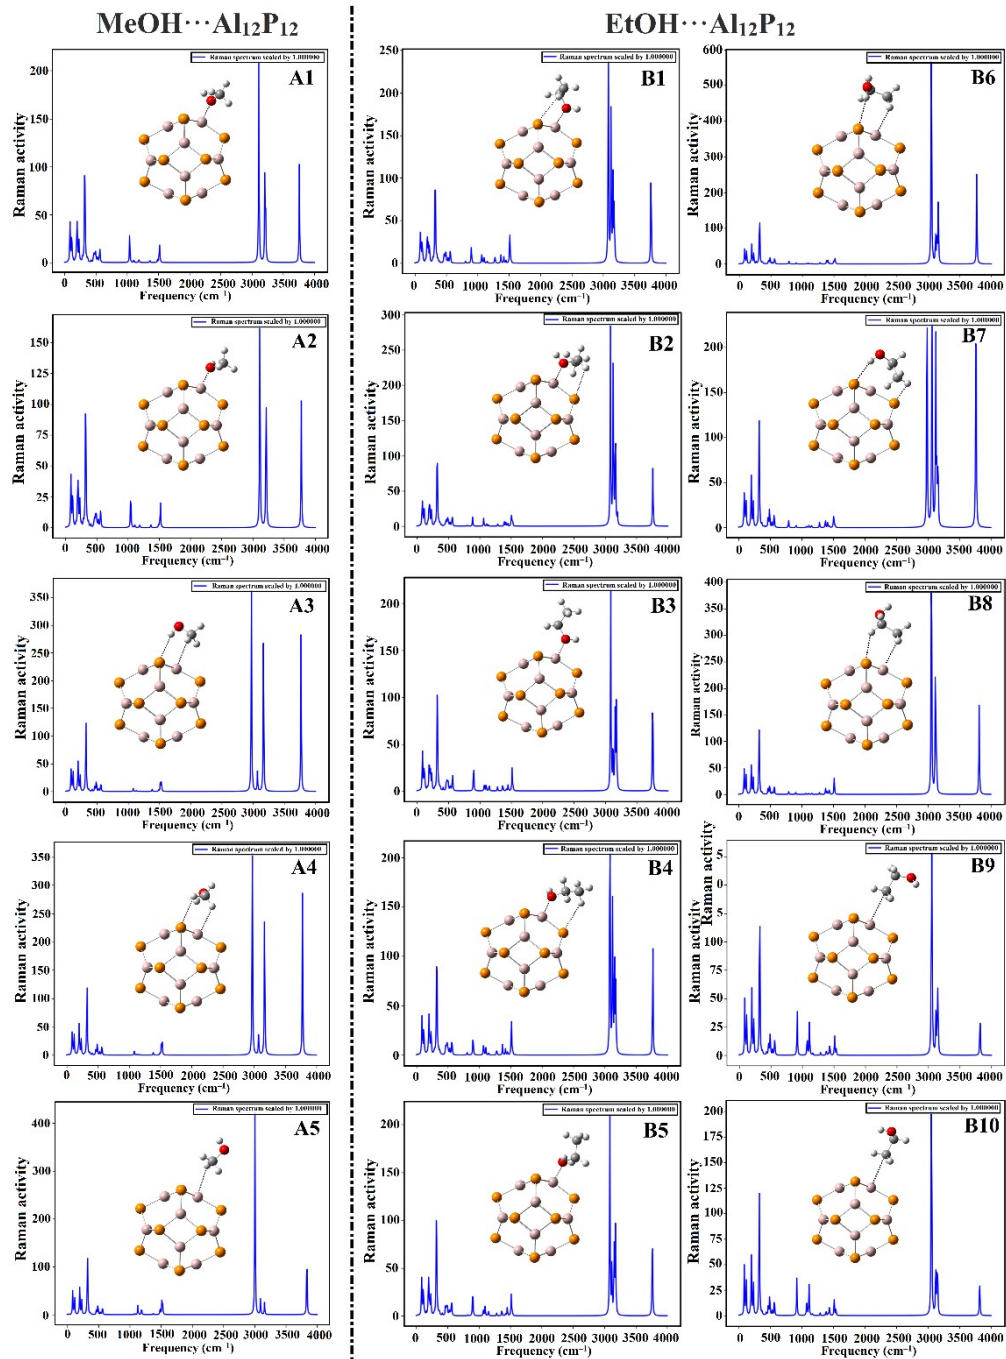

Figure S2. Raman spectra of the optimized MeOH... and EtOH...Al<sub>12</sub>P<sub>12</sub> complexes within all plausible configurations.

## Cartesian atomic coordinates and Absolute Energies

### Complex A1

Absolute Energy = -7121.233919 au.

#### Cartesian atomic coordinates:

|    |             |             |             |
|----|-------------|-------------|-------------|
| P  | -2.39156000 | -1.82906900 | -1.91106300 |
| P  | 1.68516800  | -1.81848200 | -2.80550200 |
| P  | 0.32969300  | -3.49204500 | 0.78020200  |
| P  | -3.06327100 | -1.17207000 | 1.50210200  |
| P  | -1.33907300 | 2.38457300  | 2.85244500  |
| P  | -3.01664700 | 2.18759900  | -0.96927800 |
| P  | -0.05347300 | 1.11923400  | -3.71972600 |
| P  | 3.40728700  | 1.73968000  | -1.45780700 |
| P  | 3.32551800  | -1.61349700 | 1.00608200  |
| P  | 0.38984000  | -0.56379200 | 3.76171800  |
| P  | 2.76061000  | 2.37215800  | 2.00174000  |
| P  | 0.01013000  | 4.00276000  | -0.73115300 |
| Al | 2.07246800  | 3.16810500  | -0.11178900 |
| Al | 0.82876800  | 1.53618400  | 2.85220400  |
| Al | -1.48186400 | 2.89394500  | 0.63687900  |
| Al | -1.55623000 | 0.07805200  | 2.66372500  |
| Al | -0.48072900 | -0.97655100 | -2.80925400 |
| Al | 1.89314200  | 0.49506200  | -2.60192100 |
| Al | 3.22621700  | 0.62145400  | 0.55771500  |
| Al | -2.93160400 | -0.03843800 | -0.52589500 |
| Al | -1.55880100 | -2.36846000 | 0.19273200  |
| Al | 1.28633900  | -1.82655400 | 2.09615300  |
| Al | 1.81478300  | -2.34476800 | -0.59736800 |
| Al | -0.95631000 | 2.36535300  | -2.04244200 |
| O  | 3.16203800  | 4.80461600  | -0.12214600 |
| C  | 3.46674300  | 5.47936500  | -1.36441100 |
| H  | 4.13815300  | 4.86277000  | -1.96563900 |
| H  | 3.90515200  | 6.45116600  | -1.13705900 |
| H  | 2.51061700  | 5.60996000  | -1.87160700 |
| H  | 3.94503700  | 4.71574000  | 0.44909100  |

## Complex A2

Absolute Energy = -7121.232922 au.

### Cartesian atomic coordinates:

|    |             |             |             |
|----|-------------|-------------|-------------|
| P  | -2.57090600 | -2.14322300 | -1.71892000 |
| P  | 1.43806100  | -1.95072500 | -2.86002300 |
| P  | 0.38928600  | -3.61640500 | 0.82850500  |
| P  | -3.07108000 | -1.45708000 | 1.71692300  |
| P  | -1.45398400 | 2.20399800  | 2.90689000  |
| P  | -3.33946100 | 1.85565600  | -0.80562800 |
| P  | -0.49420600 | 0.88239100  | -3.71136600 |
| P  | 3.07673600  | 1.70723600  | -1.69157800 |
| P  | 3.29130000  | -1.58230200 | 0.84208500  |
| P  | 0.47539500  | -0.63425300 | 3.75414900  |
| P  | 2.57961100  | 2.38894500  | 1.80232400  |
| P  | -0.38655200 | 3.80848700  | -0.77209000 |
| Al | 1.76558800  | 3.08713100  | -0.30069300 |
| Al | 0.75029700  | 1.46280600  | 2.77562600  |
| Al | -1.74776100 | 2.65798300  | 0.69535000  |
| Al | -1.56355300 | -0.11402500 | 2.76871500  |
| Al | -0.76283800 | -1.21479900 | -2.74535300 |
| Al | 1.54289500  | 0.37285400  | -2.70092900 |
| Al | 3.06616800  | 0.63839600  | 0.36177400  |
| Al | -3.11660400 | -0.35574200 | -0.33261800 |
| Al | -1.58667400 | -2.60090400 | 0.33855300  |
| Al | 1.33546400  | -1.87917100 | 2.05669300  |
| Al | 1.72812600  | -2.42186700 | -0.65483500 |
| Al | -1.35831500 | 2.11503100  | -2.00469200 |
| O  | 2.76987100  | 4.77510700  | -0.39560100 |
| C  | 2.62288900  | 5.68117800  | -1.51173100 |
| H  | 3.45287500  | 6.38791500  | -1.50102500 |
| H  | 1.65691700  | 6.18647600  | -1.45775900 |
| H  | 2.67544200  | 5.05938600  | -2.40581300 |
| H  | 2.84197100  | 5.23791200  | 0.45637300  |

### Complex A3

Absolute Energy = -7121.195808 au.

Cartesian atomic coordinates:

|    |             |             |             |
|----|-------------|-------------|-------------|
| P  | -2.04569300 | -2.29810300 | -1.64247500 |
| P  | 1.88851500  | -1.75713900 | -2.93050900 |
| P  | 1.13240400  | -3.32804600 | 0.85939100  |
| P  | -2.51042000 | -1.50758300 | 1.77496500  |
| P  | -1.25517100 | 2.35307000  | 2.75153100  |
| P  | -3.19149100 | 1.64222200  | -0.87952500 |
| P  | -0.35931000 | 0.82864600  | -3.83238700 |
| P  | 3.12200300  | 2.10332500  | -1.94278400 |
| P  | 3.82663800  | -1.03943700 | 0.70270600  |
| P  | 0.99088700  | -0.22795500 | 3.65224500  |
| P  | 2.68238200  | 2.90899200  | 1.47657500  |
| P  | -0.49994700 | 3.93189600  | -1.03568600 |
| Al | 1.58651700  | 3.16732300  | -0.55595900 |
| Al | 1.00745800  | 1.84017800  | 2.58836500  |
| Al | -1.67028900 | 2.68259000  | 0.53962700  |
| Al | -1.12161600 | 0.03085600  | 2.71380400  |
| Al | -0.37500200 | -1.23915500 | -2.76483700 |
| Al | 1.75488800  | 0.56161700  | -2.90920800 |
| Al | 3.37819800  | 1.12358500  | 0.15757900  |
| Al | -2.73081000 | -0.51348300 | -0.31606300 |
| Al | -0.95569700 | -2.55288300 | 0.39642100  |
| Al | 1.93168200  | -1.45677300 | 1.98519000  |
| Al | 2.30178700  | -2.07787300 | -0.71511300 |
| Al | -1.29553300 | 2.05731600  | -2.16059800 |
| O  | 6.49378800  | 2.91233100  | -1.40386100 |
| C  | 6.52895200  | 1.83848100  | -0.49743400 |
| H  | 6.28164600  | 0.87728700  | -0.96955700 |
| H  | 5.86095100  | 2.00480700  | 0.36843200  |
| H  | 7.54595400  | 1.77804200  | -0.10476100 |
| H  | 5.63347200  | 2.91724100  | -1.85338600 |

## Complex A4

Absolute Energy = -7121.195668 au.

### Cartesian atomic coordinates:

|    |             |             |             |
|----|-------------|-------------|-------------|
| P  | -2.39754500 | -2.14102400 | -1.65140300 |
| P  | 1.57697900  | -2.02158700 | -2.92396300 |
| P  | 0.63863700  | -3.55077600 | 0.84189800  |
| P  | -2.78341600 | -1.35022200 | 1.77549200  |
| P  | -1.11067100 | 2.33146000  | 2.81040800  |
| P  | -3.09909700 | 1.89236200  | -0.83389000 |
| P  | -0.36736900 | 0.80879500  | -3.79452300 |
| P  | 3.23179200  | 1.66083300  | -1.88003400 |
| P  | 3.57226900  | -1.57755100 | 0.72260000  |
| P  | 0.83226100  | -0.49555400 | 3.67996700  |
| P  | 2.86901600  | 2.45927200  | 1.55119100  |
| P  | -0.16748600 | 3.86800000  | -0.95299100 |
| Al | 1.81923900  | 2.86893100  | -0.48136500 |
| Al | 1.08093000  | 1.57226800  | 2.64666400  |
| Al | -1.47535500 | 2.73505100  | 0.60180000  |
| Al | -1.23506800 | 0.00890400  | 2.74045600  |
| Al | -0.61563800 | -1.25921700 | -2.75563400 |
| Al | 1.70077600  | 0.29684000  | -2.86991900 |
| Al | 3.36737300  | 0.62713700  | 0.20554800  |
| Al | -2.88303000 | -0.30940000 | -0.30206900 |
| Al | -1.34952000 | -2.54330800 | 0.38592300  |
| Al | 1.63793600  | -1.79603600 | 1.99549500  |
| Al | 1.94535000  | -2.41738600 | -0.71281600 |
| Al | -1.16540100 | 2.11077300  | -2.10689900 |
| O  | 6.72716600  | 1.78738400  | -1.61178500 |
| C  | 6.48638200  | 1.87093800  | -0.22935700 |
| H  | 6.03868700  | 0.94220500  | 0.17139600  |
| H  | 5.84565200  | 2.72269600  | 0.03777800  |
| H  | 7.45340900  | 1.99591100  | 0.26169300  |
| H  | 5.87585500  | 1.79250800  | -2.07778100 |

## Complex A5

Absolute Energy = -7121.192348 au.

### Cartesian atomic coordinates:

|    |             |             |             |
|----|-------------|-------------|-------------|
| P  | -2.81877000 | -1.57718000 | -1.71430500 |
| P  | 1.05191100  | -2.71448700 | -2.78491200 |
| P  | -0.47064400 | -3.76019900 | 0.95862100  |
| P  | -3.08957900 | -0.58882300 | 1.67242900  |
| P  | -0.41281100 | 2.44068600  | 2.71230900  |
| P  | -2.28967000 | 2.50317700  | -1.01484200 |
| P  | 0.10692000  | 0.53867300  | -3.80969400 |
| P  | 3.72385000  | 0.31777700  | -1.74206000 |
| P  | 2.92814700  | -2.77590000 | 0.94294500  |
| P  | 0.53054100  | -0.81210900 | 3.73849400  |
| P  | 3.45857700  | 1.30363800  | 1.64661100  |
| P  | 1.10915000  | 3.49016400  | -1.03048400 |
| Al | 2.67356700  | 1.94548700  | -0.44861900 |
| Al | 1.44562700  | 1.04323900  | 2.67517200  |
| Al | -0.54398100 | 2.86142300  | 0.47985500  |
| Al | -1.24064500 | 0.26695400  | 2.68461100  |
| Al | -0.80739800 | -1.31634400 | -2.74443900 |
| Al | 1.87806700  | -0.54030700 | -2.75864700 |
| Al | 3.41247900  | -0.63205000 | 0.35781900  |
| Al | -2.77723500 | 0.36049700  | -0.42820600 |
| Al | -2.03305700 | -2.20996000 | 0.38171200  |
| Al | 0.96892600  | -2.35333800 | 2.12390500  |
| Al | 1.18250100  | -3.13330500 | -0.55261400 |
| Al | -0.32962300 | 2.08028200  | -2.19412100 |
| O  | 6.02047500  | 4.86650700  | -1.72270900 |
| C  | 5.35987300  | 3.62116100  | -1.68655400 |
| H  | 5.05677300  | 3.35541800  | -0.65935400 |
| H  | 5.97156000  | 2.80353500  | -2.08821200 |
| H  | 4.46715300  | 3.72104000  | -2.30951200 |
| H  | 6.83654900  | 4.80859700  | -1.20823300 |



## Complex B1

Absolute Energy = -7160.534146 au.

### Cartesian atomic coordinates:

|    |             |             |             |
|----|-------------|-------------|-------------|
| P  | 1.19404000  | 14.83521300 | 0.06768200  |
| P  | 3.68895100  | 13.09235300 | -2.78674300 |
| P  | -0.35897200 | 13.71161800 | -3.63878700 |
| P  | -2.02806800 | 13.36863500 | 0.17035600  |
| P  | -1.92309700 | 9.23154000  | 0.73481300  |
| P  | 0.76223100  | 11.69753000 | 2.78199500  |
| P  | 4.27274900  | 12.05347300 | 0.53915900  |
| P  | 3.79783700  | 8.95970200  | -2.24202300 |
| P  | 0.99594100  | 10.65096500 | -4.80221700 |
| P  | -2.50162100 | 10.27601600 | -2.58961600 |
| P  | 0.55854800  | 7.47778700  | -2.15016400 |
| P  | 2.10465400  | 8.66379000  | 1.55977100  |
| Al | 2.30921200  | 8.01280000  | -0.65770900 |
| Al | -1.14256300 | 8.78662800  | -1.41605900 |
| Al | 0.07665800  | 9.75910000  | 1.68441700  |
| Al | -2.22888800 | 11.19323100 | -0.47284800 |
| Al | 2.93202600  | 13.54395200 | -0.63704300 |
| Al | 3.97884700  | 11.12043500 | -1.57608700 |
| Al | 1.72293300  | 9.14784400  | -3.24590600 |
| Al | 0.02778800  | 13.20185300 | 1.24615000  |
| Al | -0.43061700 | 14.02677000 | -1.38767700 |
| Al | -0.85935200 | 11.43709900 | -3.65014900 |
| Al | 1.68093200  | 12.59299300 | -3.73141100 |
| Al | 2.61022300  | 10.91625300 | 1.59843900  |
| O  | 3.10732200  | 6.27472900  | -0.28022200 |
| C  | 3.77234100  | 5.41159600  | -1.24193500 |
| C  | 5.27613800  | 5.52897900  | -1.12727200 |
| H  | 3.40853200  | 4.39602100  | -1.06850000 |
| H  | 3.40681200  | 5.75469700  | -2.21242400 |
| H  | 5.75130700  | 4.88751600  | -1.87523900 |
| H  | 5.59160500  | 6.56115900  | -1.30190400 |
| H  | 5.62579900  | 5.20679700  | -0.14028800 |
| H  | 3.41287500  | 6.14091200  | 0.63378200  |

## Complex B2

Absolute Energy = -7160.533259 au.

### Cartesian atomic coordinates:

|    |             |             |             |
|----|-------------|-------------|-------------|
| P  | 2.92444100  | 14.87613000 | 1.68234300  |
| P  | 5.26839800  | 13.78419500 | -1.59180000 |
| P  | 1.20979100  | 14.65651300 | -2.11445100 |
| P  | -0.32965000 | 13.48155500 | 1.58277000  |
| P  | -0.31836900 | 9.32368600  | 1.18922300  |
| P  | 2.50601900  | 11.21172000 | 3.63163700  |
| P  | 5.94493200  | 12.00699700 | 1.38541500  |
| P  | 5.30385900  | 9.63896500  | -2.01600000 |
| P  | 2.44170200  | 11.91635700 | -3.99455500 |
| P  | -0.98570500 | 11.11058200 | -1.78688700 |
| P  | 2.02680400  | 8.24140800  | -2.10005200 |
| P  | 3.72146700  | 8.51750800  | 1.69438600  |
| Al | 3.87379300  | 8.39074000  | -0.61158200 |
| Al | 0.37443100  | 9.37198300  | -1.03623300 |
| Al | 1.73158600  | 9.59887600  | 2.13924800  |
| Al | -0.61611800 | 11.51530900 | 0.47086400  |
| Al | 4.60129900  | 13.74756100 | 0.63233000  |
| Al | 5.55559200  | 11.58328700 | -0.87338300 |
| Al | 3.19266400  | 10.09126900 | -2.84714400 |
| Al | 1.75979200  | 13.03895900 | 2.50683100  |
| Al | 1.22695500  | 14.45015000 | 0.15023200  |
| Al | 0.64943300  | 12.45392900 | -2.62194600 |
| Al | 3.21532600  | 13.55174300 | -2.54141100 |
| Al | 4.29198900  | 10.68934500 | 2.22751800  |
| O  | 4.65838600  | 6.59847400  | -0.81197600 |
| C  | 4.33484200  | 5.45795100  | 0.04013100  |
| C  | 2.87521300  | 5.07162800  | -0.06671800 |
| H  | 5.00813300  | 4.64976700  | -0.25514100 |
| H  | 4.59791200  | 5.79088700  | 1.04480500  |
| H  | 2.69180800  | 4.18715800  | 0.55117900  |
| H  | 2.22949800  | 5.87978100  | 0.29055800  |
| H  | 2.59575000  | 4.83646400  | -1.09859300 |
| H  | 4.69815800  | 6.33416600  | -1.74775100 |

### Complex B3

Absolute Energy = -7160.533767 au.

Cartesian atomic coordinates:

|    |             |             |             |
|----|-------------|-------------|-------------|
| P  | 3.06566800  | 15.30636700 | 1.05916400  |
| P  | 5.42748900  | 13.32397000 | -1.75130300 |
| P  | 1.46310900  | 14.29658400 | -2.65937800 |
| P  | -0.27610700 | 14.13617000 | 1.13011900  |
| P  | -0.55568800 | 10.01361400 | 1.72755100  |
| P  | 2.31899700  | 12.24318400 | 3.79056400  |
| P  | 5.87234100  | 12.25819600 | 1.58771300  |
| P  | 5.17415000  | 9.20173300  | -1.19293100 |
| P  | 2.55016600  | 11.11617400 | -3.78231200 |
| P  | -0.99264100 | 11.07507500 | -1.61347200 |
| P  | 1.80891000  | 8.02615200  | -1.09803000 |
| P  | 3.39349800  | 9.08946400  | 2.60558700  |
| Al | 3.60825300  | 8.42540200  | 0.39369600  |
| Al | 0.21311000  | 9.48304300  | -0.40780000 |
| Al | 1.47457600  | 10.37080100 | 2.69122900  |
| Al | -0.66859400 | 11.98362300 | 0.49968400  |
| Al | 4.68655400  | 13.85522000 | 0.38529600  |
| Al | 5.52838900  | 11.34110100 | -0.52705400 |
| Al | 3.12733800  | 9.56772800  | -2.20716300 |
| Al | 1.74399500  | 13.79418600 | 2.23304300  |
| Al | 1.39224900  | 14.63689400 | -0.41170600 |
| Al | 0.75967700  | 12.07695800 | -2.66130700 |
| Al | 3.39499100  | 12.99761300 | -2.71735800 |
| Al | 4.10619900  | 11.28430000 | 2.64290200  |
| O  | 4.26764800  | 6.62854400  | 0.78008300  |
| C  | 4.33738600  | 5.55621300  | -0.19967100 |
| C  | 5.34805500  | 4.51905800  | 0.23671700  |
| H  | 3.33145900  | 5.14862600  | -0.33101200 |
| H  | 4.63914900  | 6.05643100  | -1.12254600 |
| H  | 5.41849800  | 3.73569700  | -0.52322300 |
| H  | 6.33426200  | 4.97231100  | 0.36362800  |
| H  | 5.05130300  | 4.04314100  | 1.17763100  |
| H  | 4.05954800  | 6.30820100  | 1.67553400  |

## Complex B4

Absolute Energy = -7160.532923 au.

### Cartesian atomic coordinates:

|    |             |             |             |
|----|-------------|-------------|-------------|
| P  | 1.31857300  | 14.65582600 | 0.39851300  |
| P  | 3.51897200  | 13.29272400 | -2.87559700 |
| P  | -0.58353900 | 14.01250800 | -3.25990600 |
| P  | -1.89552100 | 13.18851700 | 0.61606100  |
| P  | -1.78990300 | 9.01274300  | 0.63429300  |
| P  | 1.10472100  | 11.19193200 | 2.71607300  |
| P  | 4.39915000  | 11.84325900 | 0.22256800  |
| P  | 3.63862300  | 9.11738500  | -2.86193600 |
| P  | 0.62476600  | 11.12221000 | -4.91692100 |
| P  | -2.66953200 | 10.48099200 | -2.45973800 |
| P  | 0.37137600  | 7.64449100  | -2.68201900 |
| P  | 2.29668300  | 8.34973500  | 0.97721500  |
| Al | 2.27121700  | 7.97321100  | -1.31129100 |
| Al | -1.23356800 | 8.84831400  | -1.62193700 |
| Al | 0.30233700  | 9.41572600  | 1.43742100  |
| Al | -2.18435900 | 11.11487400 | -0.27753000 |
| Al | 2.97123000  | 13.46906000 | -0.62496900 |
| Al | 3.89114000  | 11.18143800 | -1.95454900 |
| Al | 1.48905900  | 9.42862000  | -3.65213800 |
| Al | 0.25057200  | 12.88340300 | 1.46241400  |
| Al | -0.44306600 | 14.03971700 | -0.98990500 |
| Al | -1.10877600 | 11.75822600 | -3.51117900 |
| Al | 1.42703900  | 12.91556500 | -3.68101600 |
| Al | 2.82413800  | 10.57827800 | 1.26840900  |
| O  | 2.91536100  | 6.13449300  | -1.41531500 |
| C  | 3.97160500  | 5.53170000  | -0.62132300 |
| C  | 3.39695500  | 4.65538700  | 0.46958800  |
| H  | 4.62241200  | 4.98679500  | -1.30938500 |
| H  | 4.52181000  | 6.38178200  | -0.21222000 |
| H  | 4.21070800  | 4.22778800  | 1.06266500  |
| H  | 2.75449400  | 5.24342000  | 1.13061300  |
| H  | 2.81841800  | 3.82582800  | 0.04851600  |
| H  | 2.29212500  | 5.48814300  | -1.78940200 |

## Complex B5

Absolute Energy = -7160.532602 au.

### Cartesian atomic coordinates:

|    |             |             |             |
|----|-------------|-------------|-------------|
| P  | 2.95515400  | 15.08701600 | 1.51823700  |
| P  | 5.29763000  | 13.78599900 | -1.67815500 |
| P  | 1.25721900  | 14.67573600 | -2.27276500 |
| P  | -0.31935000 | 13.74413100 | 1.47855100  |
| P  | -0.37783700 | 9.57192000  | 1.32045500  |
| P  | 2.47240100  | 11.53976500 | 3.66094200  |
| P  | 5.92884500  | 12.15684200 | 1.39507800  |
| P  | 5.27523900  | 9.62140800  | -1.87058700 |
| P  | 2.45389900  | 11.80951000 | -3.98018500 |
| P  | -1.00256800 | 11.19685500 | -1.75439400 |
| P  | 1.95230700  | 8.24908800  | -1.89304800 |
| P  | 3.64634200  | 8.72009600  | 1.86878800  |
| Al | 3.79289100  | 8.47514000  | -0.43290000 |
| Al | 0.32790400  | 9.48313500  | -0.89897700 |
| Al | 1.67535600  | 9.85546800  | 2.26092900  |
| Al | -0.63492900 | 11.72292000 | 0.47854200  |
| Al | 4.61910800  | 13.87791300 | 0.54255600  |
| Al | 5.54515100  | 11.62559000 | -0.84014000 |
| Al | 3.16647300  | 10.02509300 | -2.74615300 |
| Al | 1.75793800  | 13.31490400 | 2.43598600  |
| Al | 1.25968500  | 14.60151000 | 0.00103600  |
| Al | 0.66279700  | 12.45674900 | -2.65331400 |
| Al | 3.24654300  | 13.51737500 | -2.62213400 |
| Al | 4.24848000  | 10.90789000 | 2.29044800  |
| O  | 4.61434600  | 6.70632300  | -0.59706700 |
| C  | 4.12610600  | 5.54935700  | 0.13633700  |
| C  | 4.62915700  | 4.27616400  | -0.50668100 |
| H  | 4.43079200  | 5.65342800  | 1.18138000  |
| H  | 3.03875400  | 5.63508100  | 0.07439100  |
| H  | 4.22618300  | 3.41238200  | 0.02953600  |
| H  | 4.31092000  | 4.21937800  | -1.55052000 |
| H  | 5.72190400  | 4.21270700  | -0.46340400 |
| H  | 5.58378000  | 6.71243200  | -0.68169700 |

## Complex B6

Absolute Energy = -7160.495437 au.

### Cartesian atomic coordinates:

|    |             |             |             |
|----|-------------|-------------|-------------|
| P  | 0.98174900  | 14.73720200 | 0.24292400  |
| P  | 3.36160000  | 13.68654300 | -3.02073100 |
| P  | -0.78986000 | 13.80358800 | -3.41965200 |
| P  | -1.99701400 | 12.84041000 | 0.45874000  |
| P  | -1.31857300 | 8.72232000  | 0.51006700  |
| P  | 1.24900400  | 11.28558600 | 2.57422300  |
| P  | 4.42152600  | 12.37749000 | 0.09515500  |
| P  | 4.02847900  | 9.57329000  | -2.96495700 |
| P  | 0.79546400  | 11.11556500 | -5.08649100 |
| P  | -2.37739500 | 10.02880200 | -2.60339400 |
| P  | 1.05484300  | 7.65766000  | -2.75595500 |
| P  | 2.83402700  | 8.59631100  | 0.90756600  |
| Al | 2.71365000  | 8.50425600  | -1.36189600 |
| Al | -0.74193400 | 8.61968200  | -1.73999700 |
| Al | 0.69316800  | 9.40470800  | 1.32442900  |
| Al | -1.99436400 | 10.74349300 | -0.42308300 |
| Al | 2.78261400  | 13.78576900 | -0.76885400 |
| Al | 4.04924800  | 11.67374300 | -2.08697400 |
| Al | 1.86769400  | 9.55594700  | -3.82742700 |
| Al | 0.16780900  | 12.83766300 | 1.31047800  |
| Al | -0.66967300 | 13.87219100 | -1.14854500 |
| Al | -1.00577400 | 11.50085900 | -3.66520200 |
| Al | 1.35160500  | 12.99659900 | -3.83513300 |
| Al | 3.04820900  | 10.90048000 | 1.15075200  |
| O  | 5.82359100  | 6.61049800  | -3.87514300 |
| C  | 4.61954700  | 5.98799200  | -3.47240400 |
| C  | 4.56405100  | 5.75600400  | -1.96743300 |
| H  | 3.74866100  | 6.57185200  | -3.80748300 |
| H  | 4.58313900  | 5.03000700  | -3.99853200 |
| H  | 3.60557500  | 5.31667400  | -1.66656800 |
| H  | 5.37037400  | 5.08688600  | -1.65327700 |
| H  | 4.71327000  | 6.69762500  | -1.41905400 |
| H  | 5.78124000  | 7.54790500  | -3.62677000 |

## Complex B7

Absolute Energy = -7160.49578 au.

### Cartesian atomic coordinates:

|    |             |             |             |
|----|-------------|-------------|-------------|
| P  | 1.74874700  | 14.50863800 | 0.47601800  |
| P  | 3.90297700  | 12.70564900 | -2.60681300 |
| P  | 0.00099500  | 14.01330800 | -3.28383500 |
| P  | -1.66348200 | 13.57245200 | 0.51742900  |
| P  | -2.23328200 | 9.44088700  | 0.67125000  |
| P  | 0.85036700  | 11.20931100 | 2.86751200  |
| P  | 4.34652600  | 11.23786600 | 0.58810300  |
| P  | 3.32407900  | 8.58312300  | -2.46184400 |
| P  | 0.82303000  | 10.92916100 | -4.80818400 |
| P  | -2.66908300 | 10.89484200 | -2.52439400 |
| P  | -0.07954000 | 7.62127200  | -2.41099400 |
| P  | 1.66503600  | 8.12258000  | 1.34627500  |
| Al | 1.66675400  | 8.01067100  | -0.92589500 |
| Al | -1.57440900 | 9.09823900  | -1.53258900 |
| Al | -0.16318800 | 9.53642800  | 1.60922200  |
| Al | -2.22630800 | 11.53891600 | -0.33342400 |
| Al | 3.24750800  | 13.03848600 | -0.39835800 |
| Al | 3.91009100  | 10.61062400 | -1.60611600 |
| Al | 1.30633600  | 9.16103700  | -3.46394600 |
| Al | 0.34917300  | 12.96754000 | 1.51393300  |
| Al | 0.00291800  | 14.11677800 | -1.01105700 |
| Al | -0.86620100 | 11.86754900 | -3.51290700 |
| Al | 1.83185900  | 12.60365100 | -3.54541800 |
| Al | 2.53787100  | 10.26631700 | 1.57318200  |
| O  | 5.17394100  | 5.71378900  | -1.54373100 |
| C  | 4.58217100  | 5.76319300  | -0.26234600 |
| C  | 5.14254900  | 6.88083700  | 0.60530100  |
| H  | 3.48337200  | 5.85140900  | -0.34161500 |
| H  | 4.78222300  | 4.78991900  | 0.19425700  |
| H  | 4.70353800  | 6.85445000  | 1.60857300  |
| H  | 6.22856000  | 6.77935800  | 0.68930000  |
| H  | 4.92744000  | 7.86556900  | 0.16950800  |
| H  | 4.93387100  | 6.52048400  | -2.02830200 |

## Complex B8

Absolute Energy = -7160.492422 au.

### Cartesian atomic coordinates:

|    |             |             |              |
|----|-------------|-------------|--------------|
| P  | 2.17423000  | 2.65349400  | -10.46341300 |
| P  | 5.75024900  | 3.30852500  | -8.41173900  |
| P  | 3.97256100  | -0.46861100 | -8.35750700  |
| P  | -0.06208600 | 0.53930000  | -8.71642800  |
| P  | -0.90058700 | 1.87766000  | -4.85314700  |
| P  | -0.54523300 | 4.61955700  | -7.98079900  |
| P  | 3.40464800  | 5.94965900  | -8.21676400  |
| P  | 4.91595100  | 4.65197500  | -4.54722500  |
| P  | 5.39417700  | 0.56697200  | -5.28584800  |
| P  | 1.44587000  | -0.76366600 | -5.04864900  |
| P  | 2.67618400  | 2.53371800  | -2.80382400  |
| P  | 0.87724600  | 5.65320800  | -4.90969100  |
| Al | 2.64232000  | 4.46714200  | -4.09966100  |
| Al | 1.19541600  | 1.30811700  | -4.02115100  |
| Al | -0.33829800 | 3.87505800  | -5.78672000  |
| Al | 0.07114300  | 0.48910600  | -6.44602700  |
| Al | 3.65478200  | 3.87879100  | -9.24481500  |
| Al | 4.77690100  | 4.69590800  | -6.81720100  |
| Al | 4.50504900  | 2.38313100  | -4.23973200  |
| Al | 0.35825100  | 2.80766300  | -9.01793600  |
| Al | 2.21172600  | 0.71989100  | -9.17159000  |
| Al | 3.42198500  | -0.35745200 | -6.10063000  |
| Al | 5.18783900  | 1.31101500  | -7.48022300  |
| Al | 1.42751000  | 5.54590100  | -7.16675100  |
| O  | 6.96783600  | 4.57209500  | -0.75521200  |
| C  | 6.00563300  | 3.53901200  | -0.86828500  |
| C  | 6.54320600  | 2.33090100  | -1.62268500  |
| H  | 5.63526100  | 3.23696200  | 0.12139800   |
| H  | 5.16410000  | 3.98736400  | -1.40576000  |
| H  | 5.77342500  | 1.55523600  | -1.72448200  |
| H  | 6.90630400  | 2.63098900  | -2.61349300  |
| H  | 7.38732800  | 1.87512200  | -1.09174600  |
| H  | 7.71541700  | 4.25003700  | -0.23198700  |



## Complex B9

Absolute Energy = -7160.491735 au.

### Cartesian atomic coordinates:

|    |             |             |             |
|----|-------------|-------------|-------------|
| P  | 0.93729500  | 14.86920500 | 0.54010700  |
| P  | 3.32783100  | 13.80254000 | -2.71195100 |
| P  | -0.79595300 | 14.22636300 | -3.20293600 |
| P  | -2.16796900 | 13.17236300 | 0.59528300  |
| P  | -1.76630100 | 9.01866300  | 0.46858800  |
| P  | 0.90618000  | 11.30688900 | 2.71469800  |
| P  | 4.21169800  | 12.28684500 | 0.36049800  |
| P  | 3.72919000  | 9.64909100  | -2.83843100 |
| P  | 0.65455900  | 11.51463900 | -4.95491500 |
| P  | -2.65085500 | 10.53468600 | -2.60331400 |
| P  | 0.62090800  | 7.94969900  | -2.78663800 |
| P  | 2.35620400  | 8.59756100  | 0.95908700  |
| Al | 2.30136800  | 8.61116400  | -1.31827500 |
| Al | -1.13459400 | 8.97962100  | -1.76949400 |
| Al | 0.26244000  | 9.52518600  | 1.36434700  |
| Al | -2.27920200 | 11.12134800 | -0.38349400 |
| Al | 2.69608700  | 13.84238000 | -0.47367100 |
| Al | 3.83878800  | 11.69971000 | -1.85894800 |
| Al | 1.59153100  | 9.83861500  | -3.73446700 |
| Al | -0.03325200 | 12.98433500 | 1.49906100  |
| Al | -0.73006300 | 14.18242500 | -0.92918300 |
| Al | -1.15494700 | 11.95570200 | -3.56096800 |
| Al | 1.29794800  | 13.29670000 | -3.60610400 |
| Al | 2.71244200  | 10.86782300 | 1.31660600  |
| O  | 4.63163600  | 3.83085300  | -0.31965100 |
| C  | 4.61513000  | 4.43600700  | -1.59948000 |
| C  | 3.88462300  | 5.77408600  | -1.59728700 |
| H  | 5.63612700  | 4.56150700  | -1.98574700 |
| H  | 4.09874300  | 3.72581100  | -2.24968200 |
| H  | 3.83076600  | 6.18574900  | -2.61207100 |
| H  | 2.86913900  | 5.63658000  | -1.20847900 |
| H  | 4.41413100  | 6.49624100  | -0.96114400 |
| H  | 5.10874900  | 4.40601900  | 0.29495800  |

## Complex B10

Absolute Energy = -7160.491729 au.

### Cartesian atomic coordinates:

|    |             |             |             |
|----|-------------|-------------|-------------|
| P  | 1.09273800  | 15.04771700 | 0.12518800  |
| P  | 3.57885200  | 13.40045400 | -2.79482400 |
| P  | -0.47005600 | 14.01680000 | -3.60456900 |
| P  | -2.12523800 | 13.57733400 | 0.20283900  |
| P  | -2.01886100 | 9.42785800  | 0.64872100  |
| P  | 0.68437400  | 11.82317300 | 2.74310700  |
| P  | 4.17754800  | 12.26007200 | 0.50084200  |
| P  | 3.68754300  | 9.25141900  | -2.35141000 |
| P  | 0.87545100  | 11.00524300 | -4.88665400 |
| P  | -2.61728700 | 10.56721700 | -2.64703600 |
| P  | 0.46682400  | 7.77904100  | -2.27170200 |
| P  | 2.02853800  | 8.81277300  | 1.45791000  |
| Al | 2.11050500  | 8.52560700  | -0.79968800 |
| Al | -1.26571100 | 9.04720600  | -1.51859400 |
| Al | -0.01049900 | 9.92203700  | 1.59730400  |
| Al | -2.33089500 | 11.42453100 | -0.50351500 |
| Al | 2.82685700  | 13.78119900 | -0.62666000 |
| Al | 3.89133400  | 11.40380600 | -1.64252100 |
| Al | 1.62109600  | 9.45517700  | -3.39769100 |
| Al | -0.06263900 | 13.37750000 | 1.25997200  |
| Al | -0.53554800 | 14.27604000 | -1.34521900 |
| Al | -0.97160600 | 11.74713300 | -3.68360800 |
| Al | 1.57065400  | 12.90869600 | -3.74431500 |
| Al | 2.53055700  | 11.08176000 | 1.53734900  |
| O  | 5.46133300  | 4.19974200  | -0.95094900 |
| C  | 4.12230100  | 4.19663100  | -0.49092500 |
| C  | 3.46316100  | 5.56499000  | -0.62291600 |
| H  | 3.52944900  | 3.43712200  | -1.01917100 |
| H  | 4.17709800  | 3.90385500  | 0.56027900  |
| H  | 2.44983700  | 5.54221500  | -0.20322800 |
| H  | 4.06095300  | 6.31298500  | -0.08953400 |
| H  | 3.39139300  | 5.85751100  | -1.67860500 |
| H  | 5.47017800  | 4.41992400  | -1.89306400 |
